# Supplementary material
Source: publisher figshare collection journal article supplement (https://tandf.figshare.com/ndownloader/files/13563437)
Supplement: Supplementary file 1 [file 13563437]

**Supplementary Table. HTLV-I/II serology testing reactive results for low-risk donors.**

| No. | Sample ID | Initial Measurement (s/co) | Repeat Measurement 1 (s/co) | Repeat Measurement 2 (s/co) |
| --- | --- | --- | --- | --- |
| 1 | 10055Q17524 | 3.720 | 3.540 | 3.710 |
| 2 | 10055W08094 | 9.310 | 9.780 | 9.110 |
| 3 | 10055M13078 | 1.430 | 1.470 | 1.470 |
| 4 | 10055Q23793 | 1.520 | 1.580 | 1.460 |
| 5 | 10055Q24435 | 1.240 | 1.160 | 1.290 |
| 6 | 10055T08524 | 1.660 | 1.480 | 1.450 |
| 7 | 35055010580 | 1.03 | 0.95 | 1.14 |
| 8 | 10155014004 | 2.36 | 0.09 | 0.09 |
| 9 | 10155014107 | 2.12 | 0.15 | 0.12 |
| 10 | 12955013073 | 1.42 | 1.33 | 1.21 |
| 11 | 12955013105 | 1.38 | 1.40 | 1.19 |
| 12 | 10155014368 | 1.17 | 0.09 | 0.11 |
| 13 | 12155909077 | 1.77 | 1.54 | 1.39 |
| 14 | 13855103908 | 2.49 | 2.47 | 2.62 |
| 15 | 22055103333 | 1.58 | 1.52 | 1.57 |
| 16 | 22055103409 | 1.22 | 0.11 | 0.13 |
| 17 | 2165500347 | 1.39 | 1.33 | 1.44 |
| 18 | 11455005658 | 1.30 | 1.35 | 1.31 |
| 19 | 11455309538 | 2.39 | 3.49 | 2.69 |
| 20 | 11455224990 | 1.81 | 1.89 | 1.33 |
| 21 | 11455225243 | 1.18 | 1.28 | 1.26 |
| 22 | 11455225242 | 9.88 | 9.15 | 10.29 |
| 23 | 11455225554 | 1.37 | 1.35 | 1.39 |
| 24 | 11455309827 | 6.33 | 6.69 | 6.95 |
